# Supplementary material for: Spray deposition of AgBiS2 and Cu3BiS3 thin films for photovoltaic applications
Source: Royal Society of Chemistry journal article supplement (doi:10.1039/c7tc05711c), 2018-01-01
Supplement: c7tc05711c1.pdf [file c7tc05711c1.pdf]

## Supporting information for:

### Spray deposition of AgBiS<sub>2</sub> and Cu<sub>3</sub>BiS<sub>3</sub> thin films for photovoltaic applications

Narendra Pai<sup>a</sup>, Jianfeng Lu<sup>a</sup>, Dimuthu C. Senevirathna<sup>a</sup>, Anthony S. R. Chesman<sup>b</sup>,  
Thomas Gengenbach<sup>b</sup>, Manjunath Chatti<sup>ac</sup>, Udo Bach<sup>b,d,e</sup>, Philip C. Andrews<sup>a</sup>, Leone Spiccia<sup>a,c</sup>,  
Yi-Bing Cheng<sup>f,g</sup>, and Alexandr N. Simonov<sup>a,c</sup>

<sup>a</sup> School of Chemistry, Monash University, Melbourne, Victoria, 3800, Australia

<sup>b</sup> Commonwealth Scientific and Industrial Research Organisation Manufacturing, Clayton, Victoria 3168, Australia

<sup>c</sup> ARC Centre of Excellence for Electromaterials Science, Monash University, Melbourne, Victoria, 3800, Australia

<sup>d</sup> ARC Centre of Excellence in Exciton Science and Department of Chemical Engineering, Monash University, Melbourne, Victoria, 3800, Australia

<sup>e</sup> The Melbourne Centre for Nanofabrication, Clayton, Victoria 3168, Australia

<sup>f</sup> ARC Centre of Excellence in Exciton Science and Department of Materials Science and Engineering, Monash University, Melbourne, Victoria, 3800, Australia.

<sup>g</sup> State Key Laboratory of Advanced Technology for Materials Synthesis and Processing, Wuhan University of Technology, Wuhan 430070, China

## TABLE OF CONTENTS

|                                                                                                                                                                                    | Page |
|------------------------------------------------------------------------------------------------------------------------------------------------------------------------------------|------|
| <b>Figure S1.</b> $^1\text{H}$ and $^{13}\text{C}$ NMR spectra, results of elemental and mass-spectroscopic analysis of bismuth(III) 4-methyl benzodithiolate                      | S1   |
| <b>Figure S2.</b> FTIR spectra                                                                                                                                                     | S2   |
| <b>Figure S3.</b> Transmission electron micrographs of spray-deposited $\text{AgBiS}_2$                                                                                            | S2   |
| <b>Figure S4.</b> Thermogravimetric analysis of spray-deposited $\text{AgBiS}_2$                                                                                                   | S3   |
| <b>Figure S5.</b> Survey XP and high-resolution O 1s and S 2s spectra of spray-deposited $\text{AgBiS}_2$                                                                          | S3   |
| <b>Figure S6.</b> Scanning electron micrographs of $\text{ZnO ITO}$                                                                                                                | S3   |
| <b>Figure S7.</b> Transmittance and reflectance of spray-deposited $\text{AgBiS}_2$ and $\text{Cu}_3\text{BiS}_3$                                                                  | S4   |
| <b>Figure S8.</b> Photoelectron Spectroscopy in Air of spray-deposited $\text{AgBiS}_2$                                                                                            | S4   |
| <b>Figure S9.</b> Ultraviolet photoelectron spectra of spray-deposited $\text{AgBiS}_2$                                                                                            | S5   |
| <b>Table S1.</b> Ultraviolet photoelectron spectroscopic data analysis                                                                                                             | S5   |
| <b>Figure S10.</b> SEM image of $\text{AgBiS}_2$ film and $J$ - $V$ curve for a solar cell based thereon produced following the procedures from Ref. <sup>S1</sup>                 | S6   |
| <b>Table S2.</b> Photovoltaic parameters of a $\text{AgBiS}_2$ -based solar cell produced following the procedures from Ref. <sup>S1</sup>                                         | S6   |
| <b>Figure S11.</b> $J$ - $V$ curves for $\text{Ag HTM AgBiS}_2 \text{ZnO ITO}$ devices based on different hole transporting materials                                              | S7   |
| <b>Table S3.</b> Photovoltaic parameters for $\text{Ag HTM AgBiS}_2 \text{ZnO ITO}$ devices based on different hole transporting materials                                         | S7   |
| <b>Table S4.</b> Complete summary of the photovoltaic parameters for $\text{Ag MoO}_3\pm\text{spiro-OMeTAD AgBiS}_2 \text{ZnO ITO}$ devices produced at different $T_{\text{dep}}$ | S8   |
| <b>Figure S12.</b> $J$ - $V$ curves for $\text{Ag (MoO}_3\text{+)}\text{ spiro-OMeTAD AgBiS}_2 \text{ZnO ITO}$ devices produced at $T_{\text{dep}} = 150^\circ\text{C}$ .          | S10  |
| <b>Table S5.</b> Series and shunt resistance for $\text{Ag (MoO}_3\text{+)}\text{ spiro-OMeTAD AgBiS}_2 \text{ZnO ITO}$ derived from $J$ - $V$ curves.                             | S10  |
| <b>Figure S13.</b> $J$ - $V$ curves for $\text{Ag MoO}_3\text{+spiro-OMeTAD AgBiS}_2 \text{ZnO ITO}$ devices with varied thickness of the light-absorber layer.                    | S11  |
| <b>Table S6.</b> Photovoltaic parameters for $\text{Ag MoO}_3\text{+spiro-OMeTAD AgBiS}_2 \text{ZnO ITO}$ devices with varied thickness of the light-absorber layer.               | S11  |
| <b>Figure S14.</b> Photovoltaic performance of $\text{Ag MoO}_3\text{+spiro-OMeTAD AgBiS}_2 \text{ZnO ITO}$ under varied irradiation intensity.                                    | S12  |
| <b>Figure S15.</b> Evolution of the photovoltaic parameters of $\text{Ag MoO}_3\text{+spiro-OMeTAD AgBiS}_2 \text{ZnO ITO}$ stored under ambient conditions.                       | S12  |
| <b>Supplementary references</b>                                                                                                                                                    | S13  |

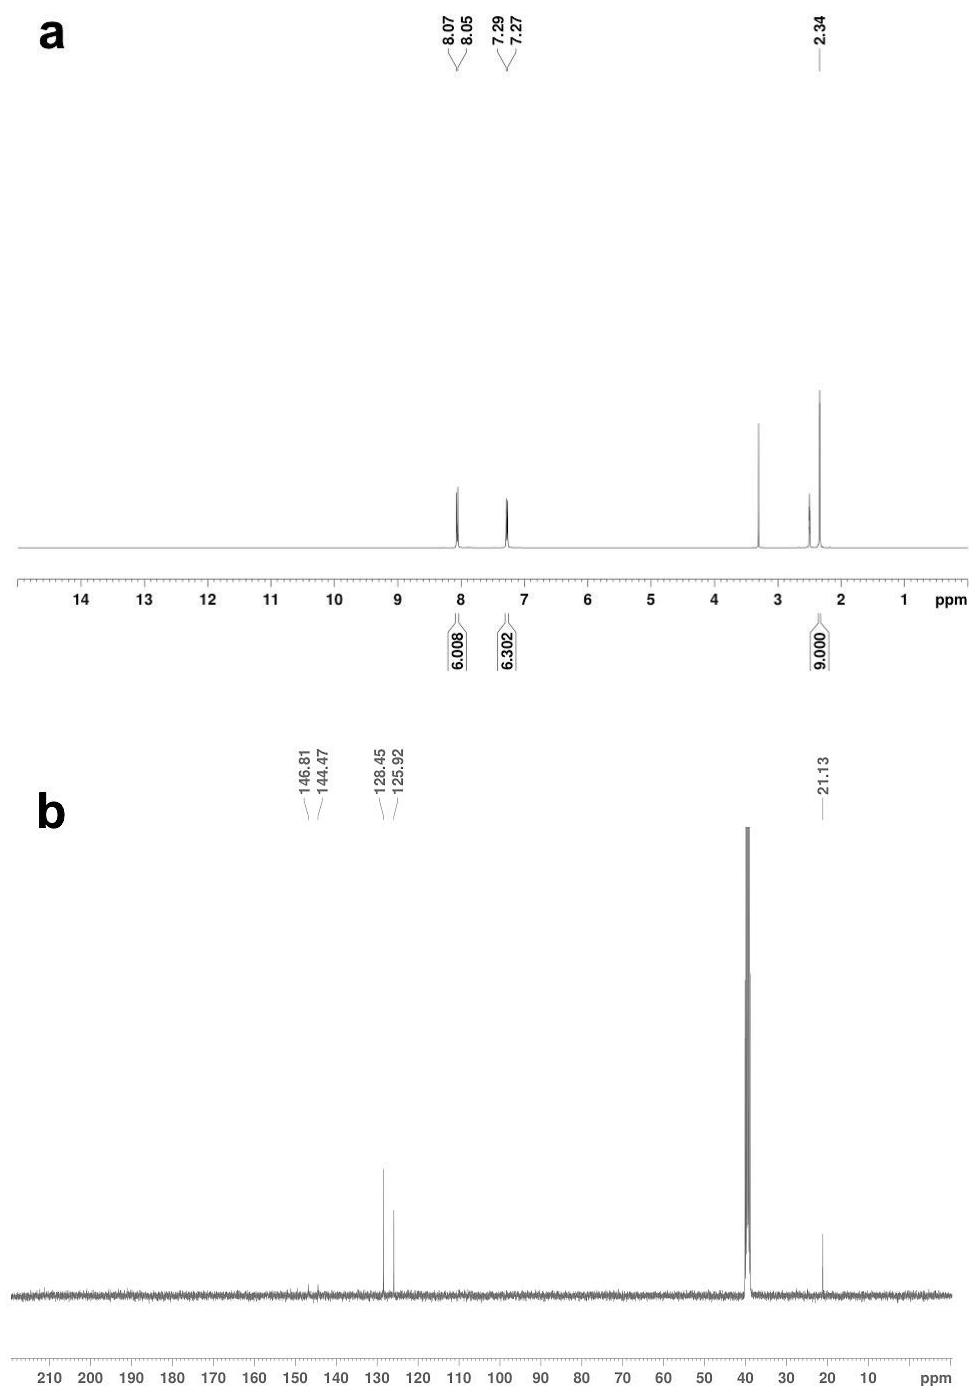

**Figure S1.** (a)  $^1\text{H}$ - and (b)  $^{13}\text{C}$ -NMR spectra of bismuth 4-methyl benzodithiolate  $[\text{Bi}(4\text{-MBDT})_3]$  in  $\text{d}_6$ -DMSO. HR-MS (ESI) $^+$   $m/z$  543  $[\text{Bi}(\text{S}_2\text{C}(\text{C}_6\text{H}_4)\text{-4-CH}_3)_2]^+$ . Elemental analysis for  $\text{C}_{24}\text{H}_{21}\text{BiS}_6$ : calculated: C 40.56, H 2.98; found: C 40.43, H 2.81.

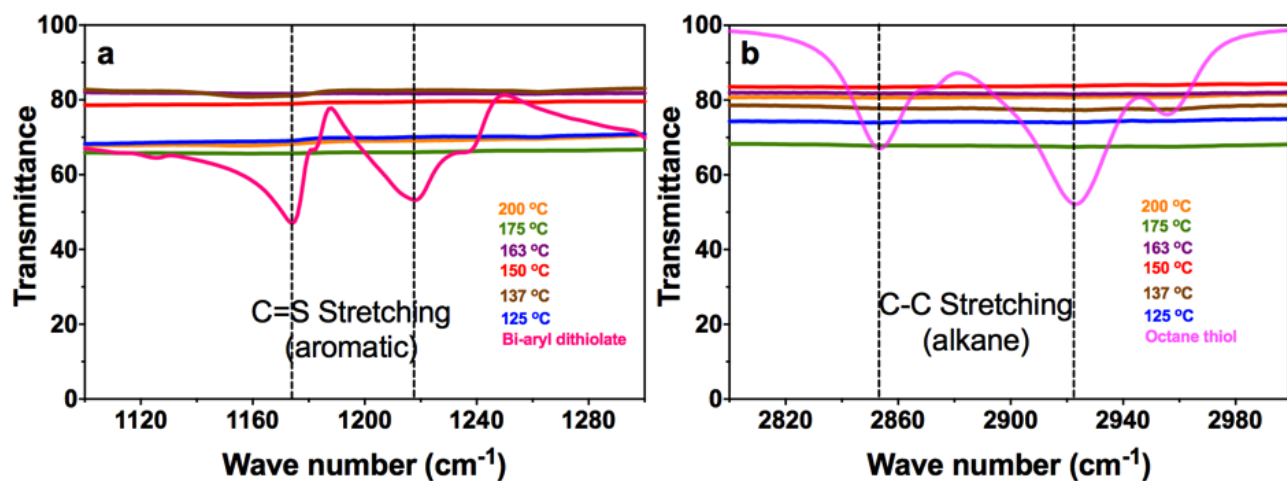

**Figure S2.** Selected ranges of the FTIR spectra of  $\text{AgBiS}_2$  films spray-deposited onto glass at different temperatures: (a) 1100-1300  $\text{cm}^{-1}$  range relevant to the aromatic C=S stretching bands (1175 and 1220  $\text{cm}^{-1}$ , dashed lines), and (b) 2800-3000  $\text{cm}^{-1}$  range relevant to the C-C stretching bands (2845 and 2915  $\text{cm}^{-1}$ , dashed lines). *Pink* and *magenta* curves show spectra for (a) bismuth(III) tris(methyl-benzodithiolate) and (b) 1-octanethiol.

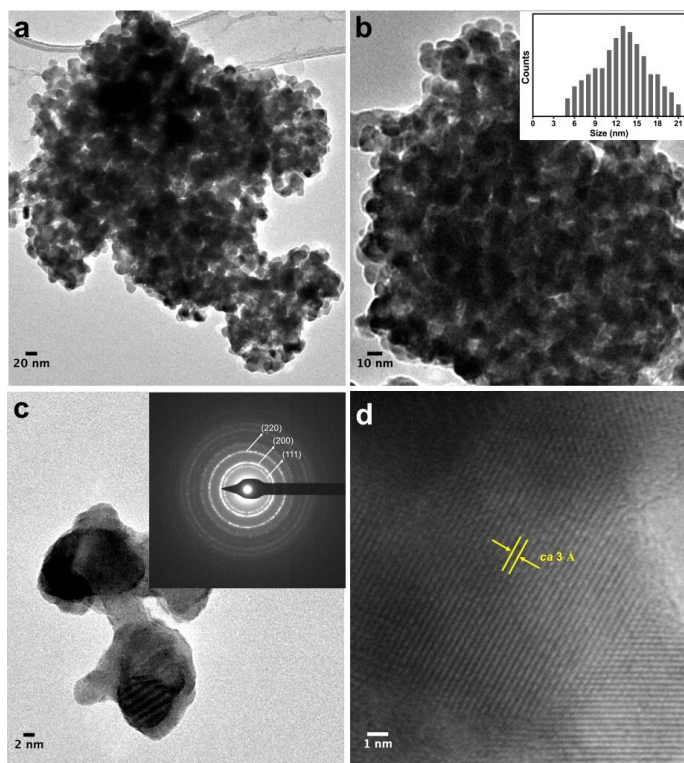

**Figure S3.** (a-c) TEM and (d) HRTEM images of  $\text{AgBiS}_2$  spray-deposited onto glass at 150 °C (the material was scratched from the support to be analysed by TEM). Inset in panel **b** shows a particle size distribution histogram based on 100 particles. Inset in panel **c** shows an indexed SAED pattern.

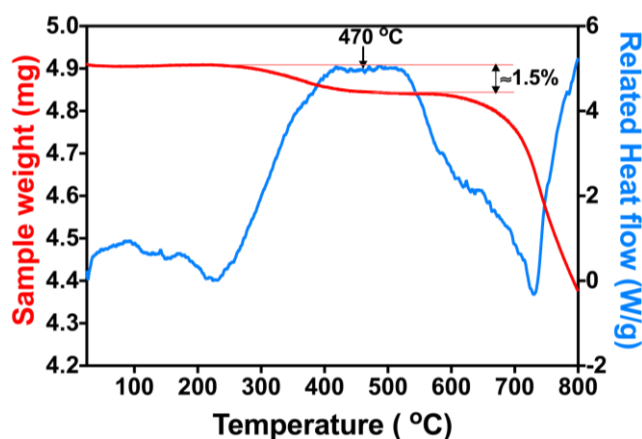

Figure S4. TGA-DSC plot obtained under high-purity Ar atmosphere for the  $\text{AgBiS}_2$  sample spray-deposited onto ZnO|ITO at 150 °C (the material was scratched from the support surface for the analysis). Sample weight loss and heat flow data are shown as *red* and *blue* curves, respectively.

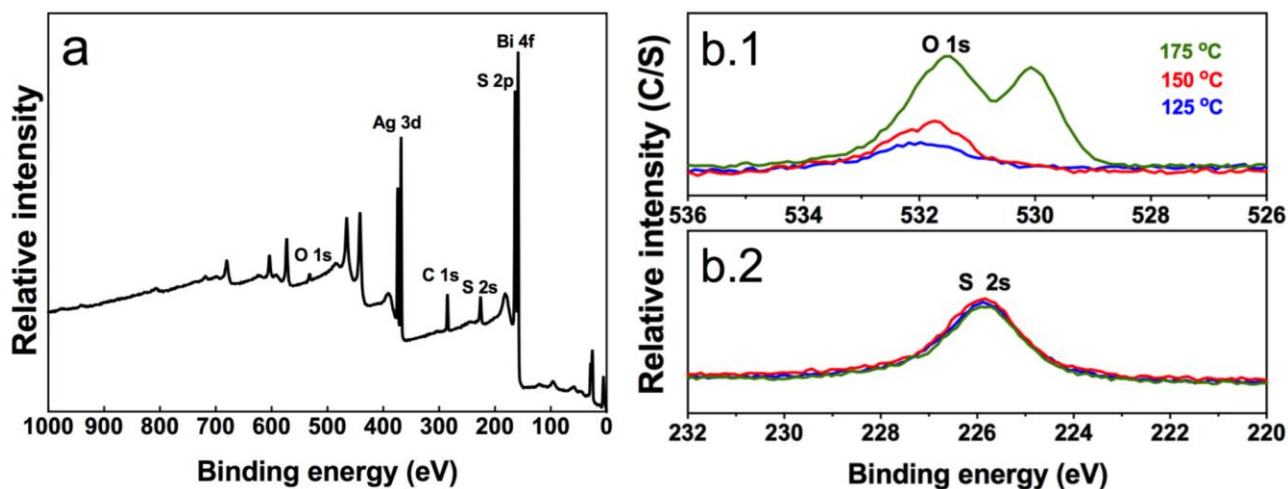

Figure S5. (a) Survey XP spectrum, (b.1) high resolution O 1s and (b.2) S 2s spectra of  $\text{AgBiS}_2$  spray-deposited onto ITO at (a) 150 °C or (b) 125 (*blue*), 150 (*red*) and 175 °C (*green*).

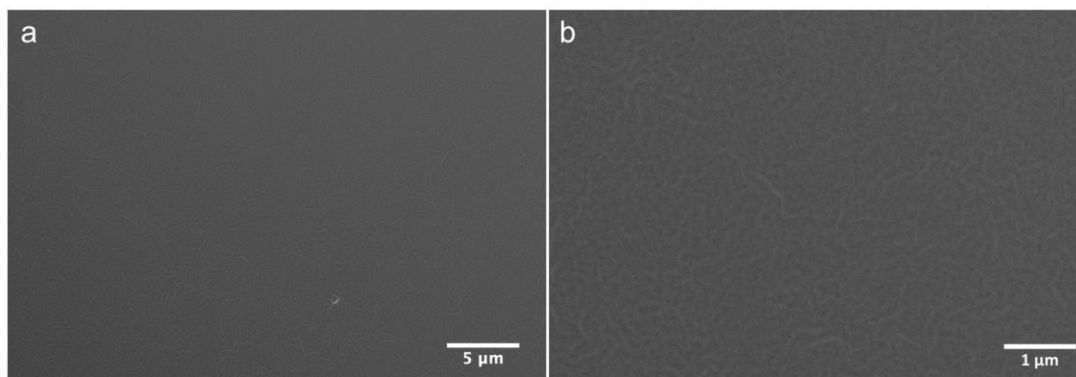

Figure S6. (a) Lower and (b) higher magnification SEM top-view images of a ZnO film on an ITO support.

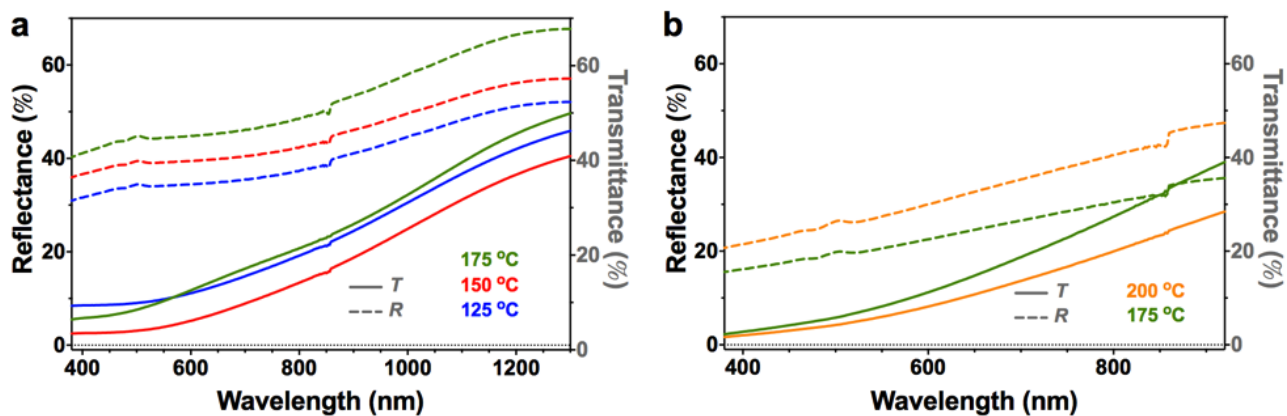

Figure S7. Reflectance ( $R$ , dashed lines) and transmittance ( $T$ , solid lines) of (a)  $\text{AgBiS}_2$  and (b)  $\text{Cu}_3\text{BiS}_3$  films spray-deposited on glass at 125 (blue), 150 (red), 175 (green) and 200 °C (orange).

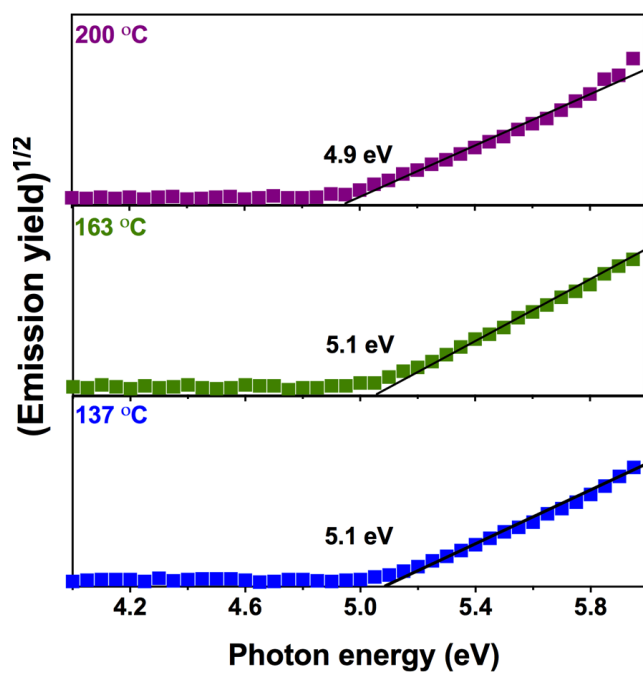

Figure S8. PESA data obtained for the  $\text{AgBiS}_2$  films deposited by spray pyrolysis onto glass substrate at 125 (blue), 150 (red) and 175 °C (green). Black lines show linear fits to the data used to derive  $E_{\text{VB}}$ .

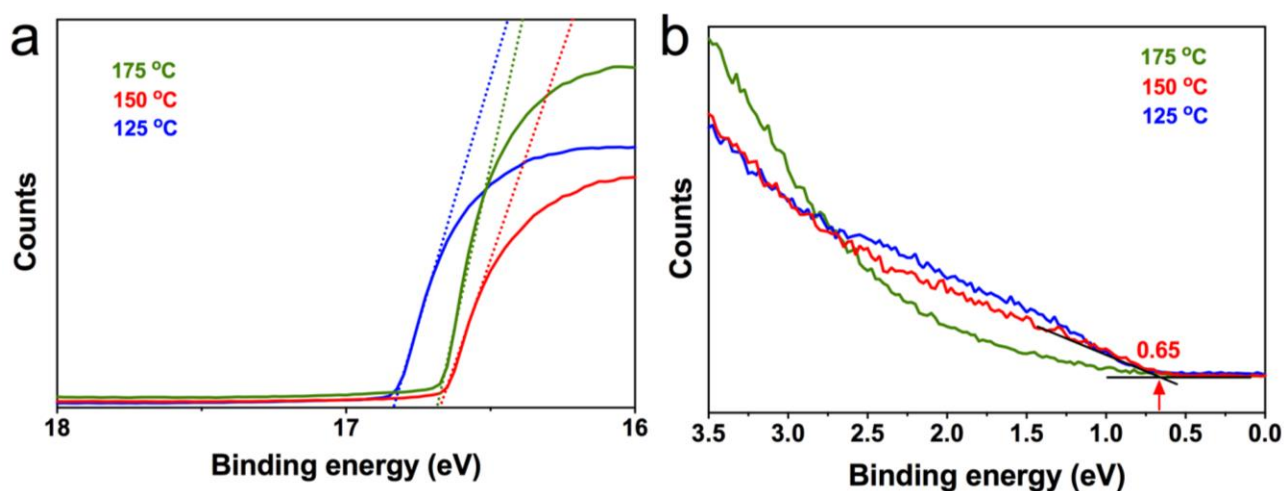

**Figure S9.** (a) Higher and (b) lower binding energy regions of the ultra-violet photoelectron spectra obtained for AgBiS<sub>2</sub> films spray-deposited onto ITO at 125 (blue), 150 (red) and 175 °C (green). Dotted lines in panel a and solid black lines in panel b show linear fits used to derive secondary electron cut-off and HOMO cut-off, respectively.

**Table S1.** Parameters derived from the analysis of the UPS data obtained for AgBiS<sub>2</sub> films spray-deposited onto ITO at different temperatures.

| Deposition temperature (°C) | Secondary electron cut-off (eV) <sup>a</sup> | Work function (eV) <sup>b</sup> | HOMO cut-off (eV) <sup>a</sup> | Ionisation potential (eV) <sup>c</sup> |
|-----------------------------|----------------------------------------------|---------------------------------|--------------------------------|----------------------------------------|
| 125                         | 16.82                                        | -4.40                           | -0.75                          | -5.15                                  |
| 150                         | 16.66                                        | -4.56                           | -0.65                          | -5.21                                  |
| 175                         | 16.66                                        | -4.56                           | -0.60                          | -5.16                                  |

<sup>a</sup> Derived from experimental data as exemplified in Figure S9. <sup>b</sup> Calculated as difference between an incident photon energy (21.22 eV) and secondary electron cut-off. <sup>c</sup> Calculated as a difference between work function and HOMO cut-off; ionisation potential serves as a reasonably accurate estimate of the valence band energy level.<sup>S1</sup>

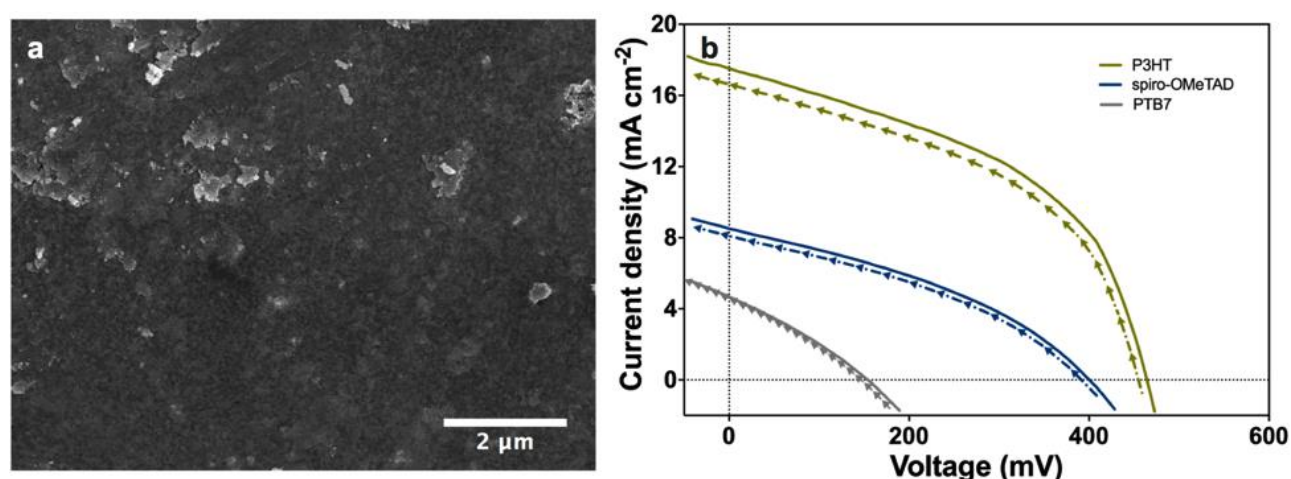

**Figure S10.** Characterisation of a  $\text{AgBiS}_2$  thin layer and  $\text{AgBiS}_2$ -based solar cells fabricated following the procedures reported by Bernechea *et al.*<sup>S2</sup>: (a) SEM top-view image of the  $\text{AgBiS}_2$  film on  $\text{ZnO|ITO}$ ; (b) photocurrent-voltage curves (scan rate  $100 \text{ mV s}^{-1}$ ) measured under 1 sun AM1.5G irradiation for the  $\text{Au|MoO}_3+\text{HTM|AgBiS}_2|\text{ZnO|ITO}$  devices (aperture  $0.16 \text{ cm}^2$ ) with spiro-OMeTAD (tan), P3HT (blue) or PTB7 (grey) as a HTM. Dashed lines with arrows and solid lines show reverse and forward bias scanning, respectively. Dotted lines are guides to the eye showing zero  $J$  and  $V$ .

**Table S2.** Photovoltaic parameters<sup>a</sup> for planar  $\text{Ag|MoO}_3+\text{spiro-OMeTAD|AgBiS}_2|\text{ZnO|ITO}$  solar cells with the light absorber layer prepared as reported in Ref.<sup>S2</sup> under 1 sun AM1.5G irradiation (aperture  $0.16 \text{ cm}^2$ ).

| HTM           | Ref.                                  | $V_{oc}$ (mV) | $J_{sc}$ ( $\text{mA cm}^{-2}$ ) | FF (%)         | PCE (%)         |
|---------------|---------------------------------------|---------------|----------------------------------|----------------|-----------------|
| spiro- OMeTAD | Bernechea <i>et al.</i> <sup>S2</sup> | 420           | 6.60                             | 42             | 1.16            |
|               | This work <sup>b</sup>                | $394 \pm 6$   | $8.0 \pm 0.1$                    | $37.0 \pm 0.2$ | $1.2 \pm 0.1$   |
| P3HT          | Bernechea <i>et al.</i> <sup>S2</sup> | 460           | 15.1                             | 57             | 3.99            |
|               | This work <sup>b</sup>                | $454 \pm 6$   | $16.5 \pm 0.2$                   | $45.0 \pm 0.2$ | $3.5 \pm 0.1$   |
| PTB7          | Bernechea <i>et al.</i> <sup>S2</sup> | $460 \pm 10$  | $17.5 \pm 1.4$                   | $60 \pm 3$     | $4.8 \pm 0.4$   |
|               | This work <sup>b</sup>                | $145 \pm 4$   | $4.5 \pm 0.2$                    | $30.0 \pm 0.4$ | $0.20 \pm 0.05$ |

<sup>a</sup> Derived from the  $J$ - $V$  curves (sweep rate  $100 \text{ mV s}^{-1}$ ) for 10 devices of each type with an aperture of  $0.16 \text{ cm}^2$ ;  $V_{oc}$  - open circuit voltage,  $J_{sc}$  - short circuit current density, FF - fill factor, PCE - power conversion efficiency. <sup>b</sup> Devices reproduced in our laboratory.

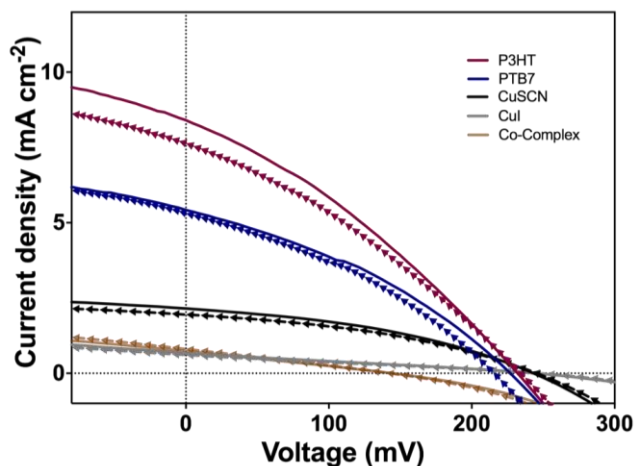

**Figure S11.** (a) Photocurrent-voltage curves (scan rate  $100 \text{ mV s}^{-1}$ ) measured under 1 sun AM1.5G irradiation for the Ag|HTM|AgBiS<sub>2</sub>|ZnO|ITO devices based on the AgBiS<sub>2</sub> films spray-deposited at  $150^\circ\text{C}$  and with P3HT+MoO<sub>3</sub> (*maroon*), PTB7+MoO<sub>3</sub> (*indigo*), CuSCN (*black*), CuI (*grey*) and [Co(bpyPY<sub>4</sub>)](OTf)<sub>2.66</sub> (*brown*) as HTM. Dashed lines with arrows and solid lines show reverse and forward bias scanning, respectively. Dotted lines are guides to the eye showing zero  $J$  and  $V$ .

**Table S3.** Photovoltaic parameters<sup>a</sup> of the planar Ag|HTM|AgBiS<sub>2</sub>|ZnO|ITO solar cells with different hole transport layers under 1 sun AM1.5G irradiation (aperture  $0.16 \text{ cm}^2$ ).

| HTM                                            | $V_{oc}$ (mV) | $J_{sc}$ ( $\text{mA cm}^{-2}$ ) | FF (%)     | PCE (%)         |
|------------------------------------------------|---------------|----------------------------------|------------|-----------------|
| P3HT + MoO <sub>3</sub>                        | $228 \pm 5$   | $8.3 \pm 0.1$                    | $32 \pm 1$ | $0.6 \pm 0.1$   |
| PTB7 + MoO <sub>3</sub>                        | $216 \pm 4$   | $5.3 \pm 0.1$                    | $34 \pm 1$ | $0.4 \pm 0.1$   |
| CuSCN                                          | $239 \pm 4$   | $2.2 \pm 0.1$                    | $36 \pm 0$ | $0.2 \pm 0.0$   |
| CuI                                            | $238 \pm 8$   | $0.8 \pm 0.1$                    | $32 \pm 0$ | $0.07 \pm 0.04$ |
| [Co(bpyPY <sub>4</sub> )](OTf) <sub>2.66</sub> | $143 \pm 5$   | $0.9 \pm 0.3$                    | $28 \pm 1$ | $0.04 \pm 0.02$ |
| Spiro-OMeTAD + MoO <sub>3</sub>                | $241 \pm 7$   | $18.1 \pm 0.6$                   | $35 \pm 1$ | $1.5 \pm 0.1$   |

<sup>a</sup> Derived from the  $J$ - $V$  curves (sweep rate of  $100 \text{ mV s}^{-1}$ ) for 10 devices of each type with an aperture of  $0.16 \text{ cm}^2$ ;  $V_{oc}$  - open circuit voltage,  $J_{sc}$  - short circuit current density, FF - fill factor, PCE - power conversion efficiency.

**Table S4.** Photovoltaic parameters<sup>a</sup> of the planar Ag|(MoO<sub>3</sub>+)spiro-OMeTAD|AgBiS<sub>2</sub>|ZnO|ITO solar cells with the light absorber formed by spray pyrolysis at different temperatures under 1 sun irradiation.

| $T_{\text{dep}}$ (°C) | MoO <sub>3</sub> <sup>b</sup> |                                        | $V_{\text{oc}}$ (mV) | $J_{\text{sc}}$ (mA cm <sup>-2</sup> ) | FF (%)     | PCE (%)     |
|-----------------------|-------------------------------|----------------------------------------|----------------------|----------------------------------------|------------|-------------|
| 125                   | N                             | SC to OC <sup>c</sup>                  | 194 ± 3              | 9.6 ± 0.2                              | 32.6 ± 0.4 | 0.61 ± 0.03 |
|                       |                               | OC to SC <sup>c</sup>                  | 191 ± 4              | 9.5 ± 0.3                              | 32.1 ± 0.5 | 0.58 ± 0.04 |
|                       |                               | Best <sup>d</sup>                      | 200                  | 9.7                                    | 32.9       | 0.64        |
|                       | Y                             | SC to OC                               | 230 ± 3              | 10.8 ± 0.4                             | 32.8 ± 0.5 | 0.78 ± 0.03 |
|                       |                               | OC to SC                               | 227 ± 2              | 10.5 ± 0.3                             | 31.9 ± 0.4 | 0.76 ± 0.03 |
|                       |                               | Best                                   | 231                  | 10.6                                   | 33.0       | 0.81        |
| 137                   | N                             | SC to OC                               | 197 ± 4              | 12.6 ± 0.4                             | 32.8 ± 0.4 | 0.82 ± 0.03 |
|                       |                               | OC to SC                               | 193 ± 4              | 12.5 ± 0.3                             | 32.4 ± 0.5 | 0.78 ± 0.06 |
|                       |                               | Best                                   | 203                  | 12.8                                   | 33.1       | 0.86        |
|                       | Y                             | SC to OC                               | 236 ± 4              | 14.7 ± 0.4                             | 33.0 ± 0.3 | 1.14 ± 0.05 |
|                       |                               | OC to SC                               | 234 ± 3              | 13.8 ± 0.5                             | 33.2 ± 0.2 | 1.08 ± 0.07 |
|                       |                               | Best                                   | 237                  | 15.1                                   | 33.2       | 1.19        |
| 150                   | N                             | FB to SC                               | 201 ± 5              | 15.4 ± 0.3                             | 33.7 ± 0.3 | 1.04 ± 0.05 |
|                       |                               | SC to FB                               | 199 ± 3              | 14.6 ± 0.5                             | 33.5 ± 0.4 | 0.98 ± 0.07 |
|                       |                               | Best                                   | 207                  | 15.7                                   | 34.1       | 1.11        |
|                       | Y                             | SC to OC                               | 241 ± 7              | 18.1 ± 0.6                             | 34.6 ± 0.5 | 1.50 ± 0.12 |
|                       |                               | OC to SC                               | 239 ± 4              | 17.9 ± 0.5                             | 34.4 ± 0.2 | 1.46 ± 0.07 |
|                       |                               | Best                                   | 251                  | 18.9                                   | 35.8       | 1.69        |
|                       |                               | Best (1 cm <sup>2</sup> ) <sup>e</sup> | 246                  | 14.9                                   | 34.1       | 1.25        |
| 163                   | N                             | SC to OC                               | 200 ± 4              | 11.7 ± 0.3                             | 34.5 ± 0.3 | 0.80 ± 0.03 |
|                       |                               | OC to SC                               | 198 ± 3              | 10.6 ± 0.5                             | 34.2 ± 0.4 | 0.73 ± 0.06 |
|                       |                               | Best                                   | 204                  | 11.8                                   | 34.6       | 0.83        |
|                       | Y                             | SC to OC                               | 237 ± 5              | 14.1 ± 0.4                             | 35.1 ± 0.4 | 1.17 ± 0.05 |
|                       |                               | OC to SC                               | 234 ± 6              | 13.8 ± 0.4                             | 34.8 ± 0.5 | 1.13 ± 0.05 |
|                       |                               | Best                                   | 236                  | 14.73                                  | 34.9       | 1.21        |

<sup>a</sup> Derived from the  $J$ - $V$  curves (sweep rate 100 mV s<sup>-1</sup>) for 10 devices of each type with an aperture of 0.16 cm<sup>2</sup> in all cases except for  $T_{\text{dep}} = 150$  where apertures of 0.16 and 1.00 cm<sup>2</sup> were applied;  $V_{\text{oc}}$  – open circuit voltage,  $J_{\text{sc}}$  – short circuit current density, FF – fill factor, PCE – power conversion efficiency. <sup>b</sup> Solar cells without (N) and with (Y) MoO<sub>3</sub> evaporated on top of the spiro-OMeTAD layer. <sup>c</sup> Mean values and standard deviation derived from measurements from short-circuit (SC) to open-circuit (OC) and in the opposite direction (OC to SC). <sup>d</sup> Data for the best-performing solar cell measured in the SC to OC direction. <sup>e</sup> Data for the best-performing solar cell with a working area of 1 cm<sup>2</sup> measured in the SC to OC direction.

**Table S4 (continued).** Photovoltaic parameters<sup>a</sup> of the planar Ag|(MoO<sub>3</sub>+)spiro-OMeTAD|AgBiS<sub>2</sub>|ZnO|ITO solar cells with the light absorber obtained by spray pyrolysis at different temperatures under 1 sun AM1.5G irradiation.

| $T_{\text{dep}}$ (°C) | MoO <sub>3</sub> <sup>b</sup> |                       | $V_{\text{oc}}$ (mV) | $J_{\text{sc}}$ (mA cm <sup>-2</sup> ) | FF (%)     | PCE (%)     |
|-----------------------|-------------------------------|-----------------------|----------------------|----------------------------------------|------------|-------------|
| 175                   | N                             | SC to OC <sup>c</sup> | 198 ± 5              | 9.9 ± 0.3                              | 34.7 ± 0.3 | 0.68 ± 0.05 |
|                       |                               | OC to SC <sup>c</sup> | 197 ± 2              | 9.6 ± 0.4                              | 34.5 ± 0.4 | 0.66 ± 0.03 |
|                       |                               | Best <sup>d</sup>     | 201                  | 10.7                                   | 35.1       | 0.76        |
|                       | Y                             | SC to OC              | 234 ± 4              | 10.4 ± 0.3                             | 35.6 ± 0.3 | 0.87 ± 0.03 |
|                       |                               | OC to SC              | 232 ± 3              | 10.3 ± 0.3                             | 35.2 ± 0.3 | 0.84 ± 0.03 |
|                       |                               | Best                  | 239                  | 10.5                                   | 35.9       | 0.90        |
| 200                   | N                             | SC to OC              | 196 ± 4              | 7.8 ± 0.3                              | 34.8 ± 0.3 | 0.53 ± 0.04 |
|                       |                               | OC to SC              | 193 ± 5              | 7.0 ± 0.5                              | 34.7 ± 0.2 | 0.48 ± 0.05 |
|                       |                               | Best                  | 200                  | 8.2                                    | 35.4       | 0.58        |
|                       | Y                             | SC to OC              | 231 ± 5              | 8.9 ± 0.4                              | 36.0 ± 0.4 | 0.74 ± 0.07 |
|                       |                               | SC to OC <sup>c</sup> | 198 ± 5              | 9.9 ± 0.3                              | 34.7 ± 0.3 | 0.68 ± 0.05 |
|                       |                               | OC to SC <sup>c</sup> | 197 ± 2              | 9.6 ± 0.4                              | 34.5 ± 0.4 | 0.66 ± 0.03 |

<sup>a</sup> Derived from the  $J$ - $V$  curves (sweep rate 100 mV s<sup>-1</sup>) for 10 devices of each type with an aperture of 0.16 cm<sup>2</sup>;  $V_{\text{oc}}$  – open circuit voltage,  $J_{\text{sc}}$  – short circuit current density, FF – fill factor, PCE – power conversion efficiency. <sup>b</sup> Solar cells without (N) and with (Y) MoO<sub>3</sub> evaporated on top of the spiro-OMeTAD layer. <sup>c</sup> Mean values and standard deviation derived from measurements from short-circuit (SC) to open-circuit (OC) and in the opposite direction (OC to SC). <sup>d</sup> Data for the best-performing solar cell measured in the SC to OC direction.

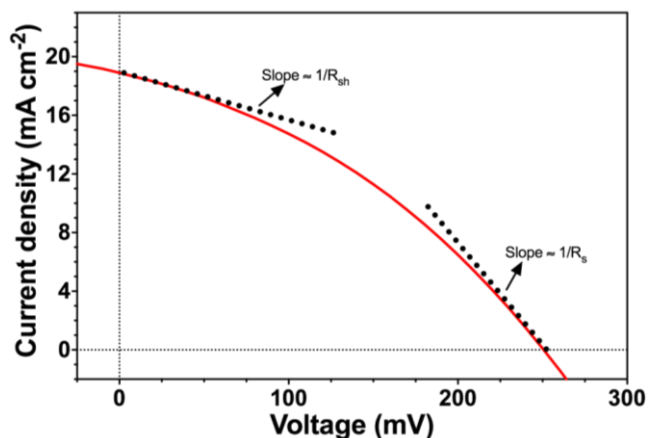

**Figure S12.** Estimation of the shunt ( $R_{sh}$ ) and series ( $R_s$ ) resistance by linear approximations (*black dotted lines*) to the  $J$ - $V$  data (sweep rate  $100 \text{ mV s}^{-1}$ ; 1 sun AM1.5G) for the Ag|MoO<sub>3</sub>+spiro-OMeTAD|AgBiS<sub>2</sub>|ZnO|ITO solar cell (aperture  $0.16 \text{ cm}^2$ ) with the light-absorber layer spray-deposited at  $150^\circ\text{C}$ .

**Table S5.** Series ( $R_s$ ) and shunt ( $R_{sh}$ ) resistance<sup>a, b</sup> for Ag|spiro-OMeTAD|AgBiS<sub>2</sub>|ZnO|ITO solar cells with the light absorber layer obtained at different temperatures.

| $T_{\text{dep}} (^\circ\text{C})$ | MoO <sub>3</sub> <sup>c</sup> | $R_{sh}^a$<br>( $\Omega \text{ cm}^{-2}$ ) | $R_s^b$<br>( $\Omega \text{ cm}^{-2}$ ) |
|-----------------------------------|-------------------------------|--------------------------------------------|-----------------------------------------|
| 125                               | N                             | 33                                         | 15                                      |
|                                   | Y                             | 37                                         | 14                                      |
| 150                               | N                             | 28                                         | 13                                      |
|                                   | Y                             | 30                                         | 7.3                                     |
| 175                               | N                             | 32                                         | 14                                      |
|                                   | Y                             | 45                                         | 14                                      |

<sup>a, b</sup> Derived from the  $J$ - $V$  data as exemplified in Figure S14. <sup>c</sup> Solar cells with (Y) and without (N) MoO<sub>3</sub> evaporated on top of the spiro-OMeTAD layer.

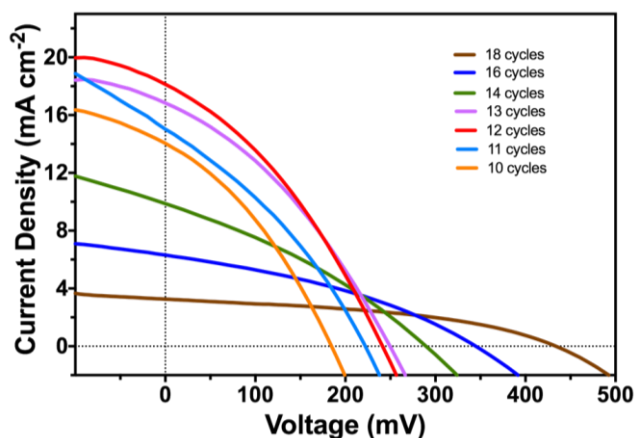

**Figure S13.** (a) Photocurrent-voltage curves (scan rate  $100 \text{ mV s}^{-1}$ ; open-circuit to short-circuit sweeps are omitted for clarity) measured under 1 sun AM1.5G irradiation for the Ag|MoO<sub>3</sub>+spiro-OMeTAD|AgBiS<sub>2</sub>|ZnO|ITO devices (aperture  $0.16 \text{ cm}^2$ ) with the light harvester layer spray-deposited at  $150^\circ\text{C}$  for different number of deposition cycles.

**Table S6.** Photovoltaic performance<sup>a</sup> of the planar Ag|MoO<sub>3</sub>+spiro-OMeTAD|AgBiS<sub>2</sub>|ZnO|ITO solar cells with the light absorber layer obtained with different number of spraying cycles at  $T_{\text{dep}} = 150^\circ\text{C}$ .

| Number of deposition cycles <sup>b</sup> |                       | $V_{\text{oc}}$ (mV) | $J_{\text{sc}}$ ( $\text{mA cm}^{-2}$ ) | FF (%)         | PCE (%)         |
|------------------------------------------|-----------------------|----------------------|-----------------------------------------|----------------|-----------------|
| 10                                       | SC to OC <sup>c</sup> | $187 \pm 6$          | $14.2 \pm 0.2$                          | $32.2 \pm 0.4$ | $0.87 \pm 0.05$ |
|                                          | OC to SC <sup>c</sup> | $184 \pm 5$          | $13.9 \pm 0.4$                          | $31.8 \pm 0.5$ | $0.85 \pm 0.06$ |
| 11                                       | SC to OC              | $222 \pm 7$          | $15.1 \pm 0.6$                          | $33.0 \pm 0.4$ | $1.11 \pm 0.08$ |
|                                          | OC to SC              | $221 \pm 4$          | $14.6 \pm 0.7$                          | $32.7 \pm 0.5$ | $1.08 \pm 0.05$ |
| 12                                       | SC to OC              | $241 \pm 7$          | $18.1 \pm 0.6$                          | $34.6 \pm 0.5$ | $1.50 \pm 0.12$ |
|                                          | OC to SC              | $239 \pm 4$          | $17.9 \pm 0.5$                          | $34.4 \pm 0.2$ | $1.46 \pm 0.07$ |
| 13                                       | SC to OC              | $253 \pm 4$          | $16.8 \pm 0.4$                          | $34.1 \pm 0.3$ | $1.41 \pm 0.05$ |
|                                          | OC to SC              | $251 \pm 5$          | $16.7 \pm 0.3$                          | $33.7 \pm 0.4$ | $1.39 \pm 0.06$ |
| 14                                       | SC to OC              | $290 \pm 3$          | $9.9 \pm 0.3$                           | $32.1 \pm 0.5$ | $0.92 \pm 0.03$ |
|                                          | OC to SC              | $287 \pm 4$          | $9.8 \pm 0.4$                           | $31.9 \pm 0.4$ | $0.90 \pm 0.04$ |
| 16                                       | SC to OC <sup>c</sup> | $345 \pm 5$          | $6.3 \pm 0.5$                           | $35.0 \pm 0.3$ | $0.75 \pm 0.05$ |
|                                          | OC to SC <sup>d</sup> | $342 \pm 5$          | $5.9 \pm 0.6$                           | $34.4 \pm 0.5$ | $0.70 \pm 0.07$ |
| 18                                       | SC to OC <sup>c</sup> | $434 \pm 4$          | $3.3 \pm 0.7$                           | $42.1 \pm 0.4$ | $0.58 \pm 0.06$ |
|                                          | OC to SC <sup>d</sup> | $431 \pm 5$          | $3.3 \pm 0.5$                           | $41.9 \pm 0.4$ | $0.57 \pm 0.05$ |

<sup>a</sup> Derived from the  $J$ - $V$  curves (sweep rate  $100 \text{ mV s}^{-1}$ ) for 10 devices of each type with an aperture of  $0.16 \text{ cm}^2$ ;  $V_{\text{oc}}$  - open circuit voltage,  $J_{\text{sc}}$  - short circuit current density, FF - fill factor, PCE - power conversion efficiency. <sup>b</sup> Solar cells fabricated by varying number of spraying cycles of AgBiS<sub>2</sub>. <sup>c</sup> Mean values and standard deviations derived from measurements from short-circuit (SC) to open-circuit (OC) and in the opposite direction (OC to SC).

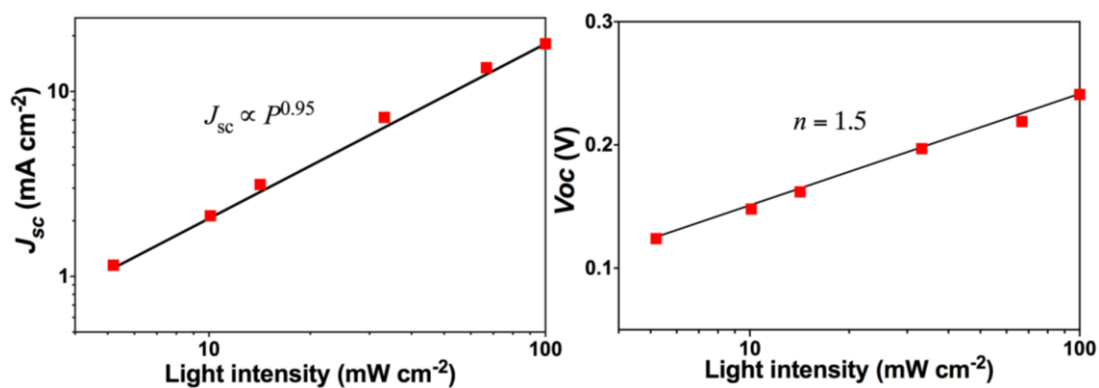

Figure S14. Dependence of (a) short-circuit current density and (b) open-circuit voltage for the  $\text{Ag}|\text{MoO}_3+\text{spiro-OMeTAD}|\text{AgBiS}_2|\text{ZnO}|\text{ITO}$  solar cells ( $T_{\text{dep}} = 150^\circ\text{C}$ ; 12 spray cycles) on irradiation intensity ( $P$ ). Solid lines show linear approximations to the experimental data. In panel b, the ideality factor  $n$  is calculated by the equation for free carrier transport proposed by Koster et al.<sup>S3,S4</sup>

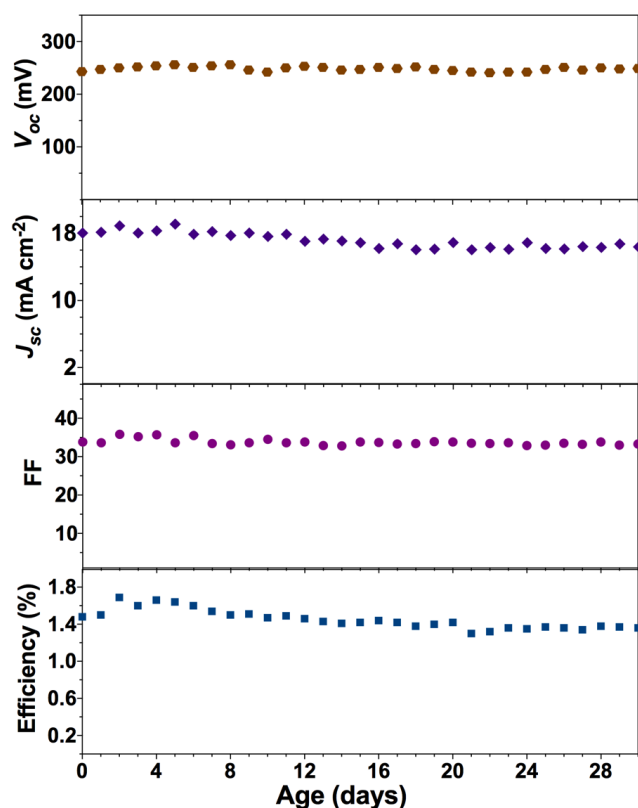

Figure S15. Evolution of the photovoltaic parameters of a non-encapsulated  $\text{Au}|\text{MoO}_3+\text{spiro-OMeTAD}|\text{AgBiS}_2|\text{ZnO}|\text{ITO}$  device stored on air under diffuse light for 1 month. The  $\text{AgBiS}_2$  film was spray-deposited at  $150^\circ\text{C}$ . Data were derived from  $J$ - $V$  curves (scan rate  $100 \text{ mV s}^{-1}$ ) recorded from short circuit to open circuit under 1 sun AM1.5G irradiation. Starting parameter values were  $V_{oc} = 250 \text{ mV}$ ,  $J_{sc} = 17.6 \text{ mA cm}^{-2}$ ,  $\text{FF} = 33.8 \%$ ,  $\text{PCE} = 1.49 \%$ .

## SUPPLEMENTARY REFENRECES

- S1. Shu, Y.; Mikosch, A.; Winzenberg, K. N.; Kemppinen, P.; Easton, C. D.; Bilic, A.; Forsyth, C. M.; Dunn, C. J.; Singh, T.; Collis, G. E., N -Alkyl functionalized barbituric and thiobarbituric acid bithiophene derivatives for vacuum deposited n-channel OFETs. *J. Mater. Chem. C* **2014**, *2*, 3895-3899.
- S2. Bernechea, M.; Miller, N.; Xercavins, G.; So, D.; Stavrinadis, A.; Konstantatos, G., Solution-processed solar cells based on environmentally friendly AgBiS<sub>2</sub> nanocrystals. *Nat. Photon.* **2016**, *10*, 521-525.
- S3. Koster, L. J. A.; Mihailetschi, V. D.; Ramaker, R.; Blom, P. W. M., Light intensity dependence of open-circuit voltage of polymer: fullerene solar cells. *Appl. Phys. Lett.* **2005**, *86*, 123509.
- S4. Proctor, C. M.; Kuik, M.; Nguyen, T.-Q., Charge carrier recombination in organic solar cells. *Prog. Polym. Sci.* **2013**, *38*, 1941-1960.
